# Supplementary material
Source: publisher figshare collection journal article supplement (https://gsajournals.figshare.com/ndownloader/files/20973687)
Supplement: Supplementary file 1 [file 20973687]

## Sheet: Table S1
Table S1	Short-read data summary
Library	Type	#raw reads	#raw bases (bp)	#processed reads	Mean Insert size in bp (expected)	Mean Insert size in bp (observed)	GC%	Mean coverage
100	PE	65622134	6562213400	64452732	259-500	203	36	9.2
1263	MP	280482300	28048230000	280481030	180-1k	711	37	40.6
3k-5k	MP	109759518	10975951800	108327272	3k-5k	544	37	15.16
5k-7k	MP	89477188	8947718800	88619814	5k-7k	630	37	12.35
No Gel	MP	95838352	9583835200	92398224	unselected	536	37	13.12
